# Supplementary material for: Exploring the Association between Misinformation Endorsement, Opinions on the Government Response, Risk Perception, and COVID-19 Vaccine Hesitancy in the US, Canada, and Italy
Source: Preprints.org preprint supplement (doi:10.20944/preprints202203.0283.v1), 2022-03-21
Supplement: Supplementary file 1 [file supplementary]

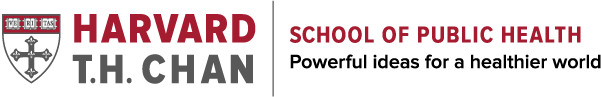


*If you intend to use this questionnaire for your project, please cite the publication and inform the authors by sending an e-mail to* [*preparedness@hsph.harvard.edu*](mailto:preparedness@hsph.harvard.edu)

1. **Have you taken the COVID-19 vaccine? (Screening question)**

- Yes, I received two doses
- Yes, I received one dose and the vaccine I took does not require a second dose
- I have received one dose of a two-dose COVID-19 vaccine and I plan to get my second dose
- I have received one dose of a two-dose COVID-19 vaccine, but I am not sure if I will get my second dose
- I have received one dose of a two-dose COVID-19 vaccine, but I do not plan to get the second dose
- Not yet, but I have an appointment scheduled
- No, and I do not have an appointment scheduled

1. **What is your sex?**

- Male
- Female

1. **What is your age?**

- 18-24
- 25-34
- 35-44
- 45-54
- Over 54

1. **What race/ethnicity do you consider yourself?**

- White, Non-Hispanic
- Black, Non-Hispanic
- Asian, Non-Hispanic
- Two or more races
- Hispanic
- Prefer not to say
- Other, please specify: **___________**

1. **What is the highest level of schooling you have completed?**

- Less than high school
- High school or equivalent
- Some college
- Bachelor's degree
- Post-graduate degree (i.e. Master, PhD, MD, etc)
- Other, please specify: **___________**

1. **Select the employment status that best describes your current situation [select one option only]:**

- I am working--paid employee
- I am working--self-employed
- I am not working--on unemployment
- I am not working--on paid leave or furloughed
- I am not working--searching for work
- I am retired
- I am not working--on disability or worker's comp
- I am not working--and not looking for a job
- Other, please specify: ___________

1. **Have you received or requested any of the following forms of support since the start of the COVID-19 pandemic?**

|  | Not requested or received | Have requested but have not yet received | Have requested but the request was rejected | Received |
| --- | --- | --- | --- | --- |
| Unemployment benefits |  |  |  |  |
| Wage support (supplement or replacement while still in employment or short-time working schemes) |  |  |  |  |
| Paid sick leave or paid care leave (for example, for those who had to self-isolate or take care of children or dependent adults) |  |  |  |  |
| State aid to businesses |  |  |  |  |
| Other support from public services to help with living expenses or household needs (e.g. benefits, allowances, vouchers, food) |  |  |  |  |

1. **How concerned are you about any of the following situations?**

|  | Very concerned | Somewhat concerned | Not concerned |
| --- | --- | --- | --- |
| Contracting COVID-19 at work?  (For example: your work settings that is not your home) |  |  |  |
| Contracting COVID-19 outside of work?  (For example: at the grocery store, when you are using transportation, or in other aspects of your daily life) |  |  |  |
| Infecting your family or friends with COVID-19? |  |  |  |

1. **Do you feel you are receiving fully transparent information about the COVID-19 situation from your national government officials?**

- Not at all
- Moderately transparent information
- Very transparent information
- I do not know

1. **I think that most of the measures taken so far by the US government to respond to the COVID-19 pandemic have been:**

- Just right
- Excessive
- Not useful
- Counter-productive
- I do not know

1. **If you were offered a COVID-19 vaccine - at no cost to you - how likely are you to take it?**

- Very likely
- Somewhat likely
- I am not sure
- Somewhat unlikely
- Very unlikely
- I would not take it at the moment but would consider it later on

1. **How much do you agree or disagree with the following statements?**

|  | Strongly disagree | Disagree | Somewhat disagree | Unsure | Somewhat agree | Agree | Strongly Agree |
| --- | --- | --- | --- | --- | --- | --- | --- |
| You cannot get COVID-19 from the vaccine itself |  |  |  |  |  |  |  |
| There are no toxic ingredients in the vaccine that can harm your health |  |  |  |  |  |  |  |
| The vaccine cannot mess up your DNA |  |  |  |  |  |  |  |
| The vaccine cannot cause infertility |  |  |  |  |  |  |  |
| The vaccine cannot cause other diseases |  |  |  |  |  |  |  |
| The fast production of the vaccine did not compromise its safety |  |  |  |  |  |  |  |
| There is no microchip with tracking capabilities inserted in the vaccine |  |  |  |  |  |  |  |
